# Supplementary material for: Clinician survey regarding measurable residual disease-guided decision-making in multiple myeloma
Source: PubMed Central journal article supplement (PMC9276661; doi:10.1038/s41408-022-00705-6), 2022-07-11
Supplement: 41408_2022_705_MOESM1_ESM.pdf [file 41408_2022_705_MOESM1_ESM.pdf]

# Survey: Use of MRD for Decision Making in Multiple Myeloma

You are being invited to participate in an anonymous survey titled "MODEMM: Use of Minimal Residual Disease for Decision Making in Multiple Myeloma". This survey is being conducted by Benjamin Derman, MD and Andrzej Jakubowiak, MD, PhD from the University of Chicago Medical Center and Michael Thompson, MD, PhD from Aurora Health Care. You were selected to participate in this survey because you are a clinician who treats patients with multiple myeloma.

The purpose of this research study is to better understand myeloma clinicians' practice habits and attitudes toward the use of minimal residual disease (MRD) for decision-making in multiple myeloma. If you agree to take part in this study, you will be asked to complete an online survey below. It will take you approximately 10 minutes to complete.

You may not directly benefit from this research; we hope that your participation in the study may help the myeloma community at large understand how MRD status is currently being used clinically in order to better inform research in this field.

We believe there are no known risks associated with this research study. To the best of our ability, your answers will remain confidential on a secure server. Your participation in this study is completely voluntary and you can withdraw at any time.

If you have questions or concerns about this project, contact [bderman@medicine.bsd.uchicago.edu](mailto:bderman@medicine.bsd.uchicago.edu).

By clicking "I agree" below you are indicating that you are at least 18 years old, have read and understood this consent form and agree to participate in this research study.

---

Do you agree to proceed?

- I agree  
 I do not agree

---

1 Which of the following best describes the healthcare setting in which you work?

- Academic health system  
 Private practice  
 Hybrid model (private with academic affiliation)

---

2 In what area of the world do you practice medicine?

- Africa  
 Asia  
 Australia  
 Europe  
 North America  
 South America

---

3 What is your degree?

- MD, DO, or equivalent  
 MD, PhD  
 PA  
 NP (i.e. APN, DNP, or equivalent)  
 Other

---

4 How many years have you been a practicing hematology/oncology clinician?

\_\_\_\_\_ (Please provide a single number estimate)

---

5 Approximately how many multiple myeloma patients do you see per week?

\_\_\_\_\_ (Please provide a single number estimate)

- 6 Do you use any of the following guidelines for decision making in multiple myeloma?
- NCCN
  - US Oncology
  - VIA Oncology/Elsevier ClinicalPath
  - Atrium
  - ESMO
  - Other
  - None of the above

If 'Other', please list guidelines you use

---

- 7 What is the extent of your participation in clinical trials specifically enrolling patients with multiple myeloma?
- Principal investigator (PI)
  - Co-investigator
  - None of the above
- (Check all that apply)

- 8 Do you have patients enrolled on any clinical trials that use minimal residual disease as an endpoint?
- Yes  
 No

- 9 Outside of clinical trials, are you assessing for minimal residual disease in any of your patients?
- Yes  
 No

**FOR RESPONDENTS WHO ANSWER 'NO' TO #9**

- 10 You indicated that you are not assessing MRD status in your patients. What are your reason(s) for not assessing for MRD? Please select up to 3 choices.
- I am not familiar with the concept of MRD
  - MRD is not an appropriate surrogate endpoint
  - I don't know what to do with MRD status information
  - I don't have the capability to measure MRD
  - Cost/insurance coverage
  - I don't want to subject my patient to another bone marrow biopsy
  - The depth of my institution's MRD testing may be insufficient
  - No consensus on the correct timing of MRD testing
  - Other (please specify)
- (Select up to 3 choices)

**FOR RESPONDENTS WHO ANSWER 'YES' TO #9**

- 10 What method(s) are you using to assess for minimal residual disease?
- Flow cytometry
  - PCR (Polymerase chain reaction)
  - NGS (Next generation sequencing)
  - PET-CT
  - MRI
  - Other (please specify)
- (Select all that apply)

Please specify 'other':

---

- 11 What is your PREFERRED method for assessing for MRD?
- Flow cytometry  
 PCR (Polymerase chain reaction)  
 NGS (Next generation sequencing)  
 PET-CT  
 MRI  
 Other (please specify)

Please specify 'other':

---

- 12 What is the lower limit of detection (analytical sensitivity) of your preferred method of MRD testing?
- $10^{-4}$  [1 aberrant plasma cell in 10,000 cells]  
  $10^{-5}$  [1 aberrant plasma cell in 100,00 cells]  
  $10^{-6}$  [1 aberrant plasma cell in 1,000,000 cells]  
 I don't know

- 13 Do any of the following methods for MRD detection in myeloma have FDA approval?
- Flow Cytometry  
 NGS [i.e. clonoSEQ, etc.]  
 PET/CT  
 MRI  
 None  
 (Check all that apply)

**FOR ALL RESPONDENTS**

We will now present a series of 5 patient scenarios and we would like for you to respond with your thoughts on how you would manage these situations. (Estimated time per scenario: 1 minute)

- 14 A 56 year old woman (ECOG PS 0) was diagnosed 4 months ago with ISS 1, IgG Kappa Multiple Myeloma with standard-risk cytogenetics (trisomy 3, 5, and 7). She had measurable disease and a positive PET/CT at baseline. She has received 4 cycles of bortezomib, lenalidomide, and dexamethasone (VRd) and her SPEP/immunofixation shows no monoclonal protein and light chains have normalized. She presents for evaluation for potential high dose melphalan and autologous stem cell rescue. You decide to perform a bone marrow biopsy and aspiration with evaluation by your preferred method of MRD and PET/CT; both test results show MRD-negativity.
- Continue VRd and defer autologous transplant  
 Proceed to autologous transplant  
 Proceed to single agent maintenance therapy  
 I would not have performed a bone marrow biopsy or PET/CT at this time

Question: After collection of stem cells, what do you advise the patient?

- Would your answer differ if the patient had high risk disease?
- No  
 Yes (explain)

Please explain briefly how your actions would be different.

\_\_\_\_\_

- Would your answer differ if the patient was MRD-positive?
- No  
 Yes (explain)

Please explain briefly how your actions would be different.

\_\_\_\_\_

- 15 A 78 year old man presented to you with ISS 2, standard risk cytogenetics, IgG Lambda Multiple Myeloma 6 months ago and started therapy with bortezomib, lenalidomide, and dexamethasone. He was deemed transplant ineligible and he just completed 8 cycles of treatment. He has not experienced significant toxicities from therapy. He currently has no detectable disease by serum markers. He undergoes a bone marrow biopsy with evaluation by your preferred MRD method and PET/CT, and the bone marrow MRD result returns positive for residual disease.

- Continue VRd until toxicities emerge, then switch to maintenance at later point  
 Switch to single-agent maintenance therapy  
 Switch to alternative triplet therapy  
 I would not perform a bone marrow biopsy or PET/CT in this scenario

Question: What do you advise the patient?

Would your answer differ if the patient had high risk disease?

- No  
 Yes (explain)

Please explain briefly how your actions would be different.

Would your answer differ if the patient was MRD-negative?

- No  
 Yes (explain)

Please explain briefly how your actions would be different.

- 16 A 58 year old man (ECOG PS 1) with standard-risk ISS 1 (no high risk cytogenetics), lambda light chain only Multiple Myeloma received 5 cycles of induction therapy with bortezomib, lenalidomide, and dexamethasone (VRd). He then received high-dose melphalan and autologous stem cell rescue. At day +100 after his transplant, he has no detectable disease by serum or urine markers. He undergoes a bone marrow biopsy with your preferred MRD method, and the result returns positive for MRD.

- Start VRd (or other triplet) consolidation  
 Start single agent maintenance therapy  
 Proceed with second (tandem) transplant  
 I would not perform a bone marrow biopsy or PET/CT in this scenario

Question: What do you advise the patient?

Would your answer differ if the patient had high risk disease?

- No  
 Yes (explain)

Please explain briefly how your actions would be different.

Would your answer differ if the patient was MRD-negative?

- No  
 Yes (explain)

Please explain briefly how your actions would be different.

---

- 17 A 62 year old female with ISS 2, IgG Kappa Multiple Myeloma with hyperdiploidy (standard risk) cytogenetics received 4 cycles of bortezomib, lenalidomide, and dexamethasone, followed by melphalan and autologous stem cell rescue, followed by maintenance lenalidomide. She has been on maintenance therapy for 3 years. She has grade 1 diarrhea from lenalidomide and intermittent cytopenias that previously required a dose reduction of lenalidomide. One year ago, a bone marrow biopsy with your preferred MRD evaluation and PET/CT were negative for disease. Her serum and urine myeloma markers are normal. She undergoes a repeat bone marrow biopsy with your preferred MRD evaluation and PET/CT and both results return negative for MRD.

- Continue maintenance indefinitely  
 Continue maintenance for a fixed duration if remains MRD-negative  
 Stop maintenance therapy and start active surveillance  
 I would not perform testing at this time (would not affect management)

Question: What do you advise the patient?

---

Would your answer differ if the patient had high risk disease?

- No  
 Yes (explain)
- 

Please explain briefly how your actions would be different.

---

- 18 Consider a similar patient: A 62 year old female with ISS 2 IgG Kappa Multiple Myeloma with hyperdiploidy (standard risk) cytogenetics received 4 cycles of bortezomib, lenalidomide, and dexamethasone, followed by melphalan and autologous stem cell rescue, followed by maintenance lenalidomide. She has been on maintenance therapy for 3 years. One year ago, a bone marrow biopsy with your preferred MRD evaluation and PET/CT were negative for disease. Her serum and urine myeloma markers are normal. She undergoes a bone marrow biopsy with your preferred MRD evaluation and PET/CT and the bone marrow testing reveals MRD-positivity.

- Continue current maintenance therapy  
 Switch to alternative maintenance therapy  
 Start multi-drug anti-myeloma therapy  
 I would not perform testing at this time (would not affect management)

Question: What do you advise the patient?

---

Would your answer differ if the patient had high risk disease?

- No  
 Yes (explain)
- 

Please explain briefly how your actions would be different.

---

---

19 Which of the following concerns do you still have about using MRD to guide your decision making in multiple myeloma? Please select up to 3 choices.

- I have no concerns
- MRD is not a surrogate endpoint for survival
- No data to support MRD in decision making
- Cost/insurance coverage
- Subjecting my patient to another bone marrow biopsy
- The depth of my institution's MRD testing is insufficient for me
- No consensus on the correct timing of MRD testing
- Other (please specify)  
(Select up to 3 choices)

---

Please specify 'other': \_\_\_\_\_

---

Thank you for your time and your thoughtful responses. Please feel free to leave any comments, suggestions, or feedback.
